# Supplementary material for: Design of BPEA-based derivatives with high singlet fission performance: a theoretical perspective
Source: Royal Society of Chemistry journal article supplement (doi:10.1039/d2cp05139g), 2023-01-01
Supplement: d2cp05139g1.pdf [file d2cp05139g1.pdf]

# Design of BPEA-based Derivatives with High Singlet Fission Performance: A theoretical Perspective

Jian Song\*, Hongjin Li, Zhongpo Zhou, Yonggang Yang\*, ChaoChao Qin, Yufang

Liu

*School of Physics, HeNan Normal University, Xin Xiang City, 453007, China.*

Corresponding Author: [songjian@htu.edu.cn](mailto:songjian@htu.edu.cn), [yangyonggang@htu.edu.cn](mailto:yangyonggang@htu.edu.cn).

Further calculations are detailed in the Supplementary information. The crystal structure information of BPEA and its derivatives is given in Section A. Section B is about the selection of functionals and basis sets, and gives the detailed calculation data. Section C deals with further analysis of electronic states.

## A. Crystal structure information

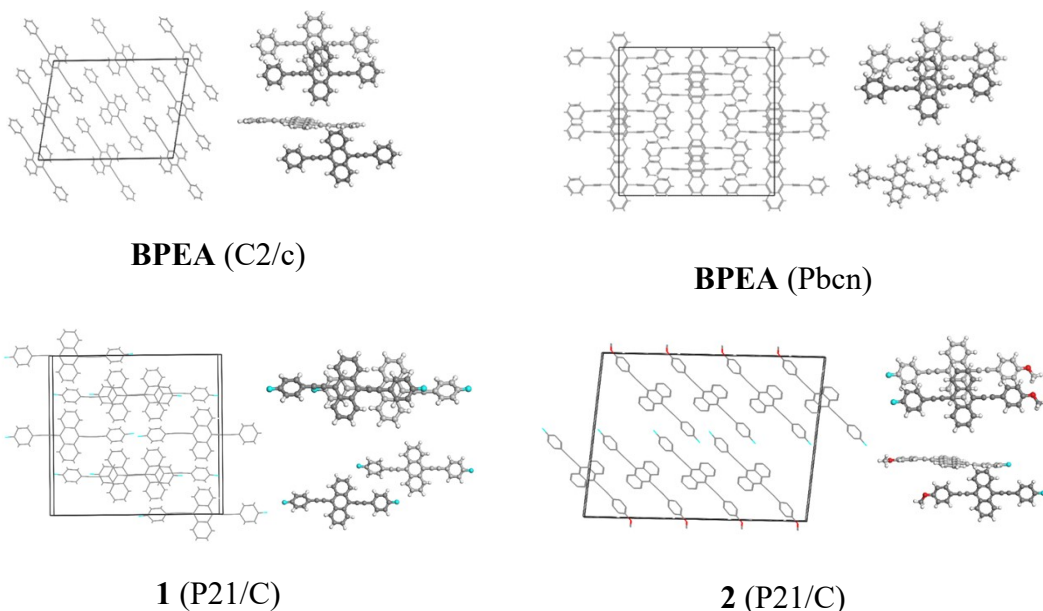

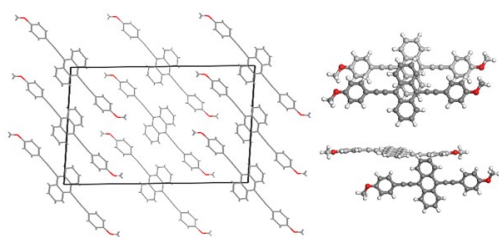

**3 (C2/C)**

Figure S1. Crystal packing structures and selected dimers of **BPEA**, derivative **1**, **2**, and **3**. Data come from ref<sup>1,2,3</sup>

Table S1. Summary of crystal parameters for **BPEA** and its derivatives, ref<sup>1-3</sup>.

|             | <b>BPEA(C2/c)</b> | <b>BPEA(Pbcn)</b> | <b>1 (P21/C)</b> | <b>2 (P21/C)</b> | <b>3 (C2/C)</b> |
|-------------|-------------------|-------------------|------------------|------------------|-----------------|
| <b>a</b>    | 22.866(5) Å       | 24.305(4) Å       | 6.8920 (9) Å     | 24.7160 (10) Å   | 26.095(5) Å     |
| <b>b</b>    | 5.3567(11) Å      | 11.512(1) Å       | 11.8321 (16) Å   | 5.2272 (2) Å     | 5.1784(11) Å    |
| <b>c</b>    | 16.930(3) Å       | 7.099(1) Å        | 25.181 (4) Å     | 16.6641 (8) Å    | 16.585(3) Å     |
| <b>α</b>    | 90 °              | 90 °              | 90 °             | 90 °             | 90 °            |
| <b>β</b>    | 99.72(3) °        | 90 °              | 92.247 (6) °     | 95.493 (2) °     | 93.988(5)       |
| <b>γ</b>    | 90 °              | 90 °              | 90 °             | 90 °             | 90 °            |
| <b>CCDC</b> | 715257            | 1205622           | 1909837          | 1907242          | 234275          |

## B. Selection of functional and basis group

### Basis sets test

Table S2. Comparing the theoretical  $E(S_1)$  and  $E(T_1)$  of monomers calculated by different basis sets with experiments. The functional is  $\omega$ B97X-D and the experimental data come from ref<sup>1-3</sup>. (unit: eV).

|      |       | 6-31g** | 6-31+g** | 6-311g** | 6-<br>311+g** | 6-311++g** | Exp      |
|------|-------|---------|----------|----------|---------------|------------|----------|
| BPEA | $S_1$ | 2.918   | 2.885    | 2.888    | 2.873         | 2.873      | 2.64     |
|      | $T_1$ | 1.339   | 1.349    | 1.348    | 1.351         | 1.351      | --       |
| 1    | $S_1$ | 2.764   | 2.736    | 2.736    | 2.723         | 2.723      | 2.65     |
|      | $T_1$ | 1.138   | 1.153    | 1.149    | 1.154         | 1.154      | 1.12-1.3 |
| 2    | $S_1$ | 2.793   | 2.763    | 2.763    | 2.751         | 2.751      | 2.59     |
|      | $T_1$ | 1.215   | 1.227    | 1.225    | 1.229         | 1.229      | 1.12-1.3 |
| 3    | $S_1$ | 2.832   | 2.799    | 2.801    | 2.788         | 2.788      | 2.59     |
|      | $T_1$ | 1.265   | 1.275    | 1.273    | 1.276         | 1.276      | 1.12-1.3 |

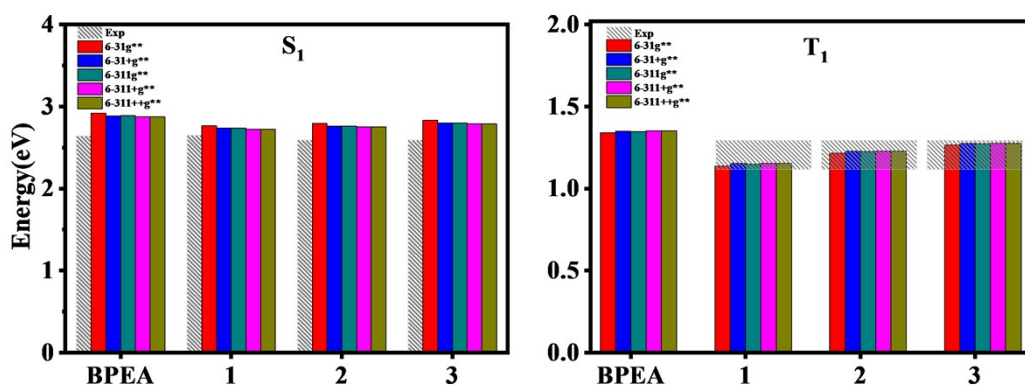

Figure S2. Comparing the theoretical  $E(S_1)$  and  $E(T_1)$  of monomers calculated by different basis sets with experiments. The experimental data come from ref<sup>1-3</sup>.

## Selection of functional

Table S3. Comparing the theoretical  $E(S_1)$  and  $E(T_1)$  of monomers calculated by different functionals with experiments. The basis set is 6-311+g\*\*. The experimental data come from ref<sup>1-3</sup>. (unit: eV).

|             |       | PBE0  | M06-2X | M06-HF | CAM-B3LYP | $\omega$ B97X-D | Exp      |
|-------------|-------|-------|--------|--------|-----------|-----------------|----------|
| <b>BPEA</b> | $S_1$ | 2.608 | 2.865  | 2.559  | 2.843     | 2.873           | 2.64     |
|             | $T_1$ | 1.358 | 1.741  | 1.376  | 1.257     | 1.351           | --       |
| <b>1</b>    | $S_1$ | 2.471 | 2.714  | 2.424  | 2.694     | 2.723           | 2.65     |
|             | $T_1$ | 1.203 | 1.577  | 1.219  | 1.052     | 1.154           | 1.12-1.3 |
| <b>2</b>    | $S_1$ | 2.473 | 2.737  | 2.432  | 2.718     | 2.751           | 2.59     |
|             | $T_1$ | 1.258 | 1.639  | 1.266  | 1.131     | 1.229           | 1.12-1.3 |
| <b>3</b>    | $S_1$ | 2.49  | 2.769  | 2.453  | 2.752     | 2.788           | 2.59     |
|             | $T_1$ | 1.293 | 1.672  | 1.309  | 1.179     | 1.276           | 1.12-1.3 |

Table S4. Comparing the theoretical  $E(S_1)$  and  $E(T_1)$  of dimers calculated by different functionals with experiments. The basis set is 6-311+g\*\*. The experimental data come from ref<sup>1-3</sup>. (unit: eV).

|             |       | PBE0  | M06-2X | M06-HF | CAM-B3LYP | $\omega$ B97X-D | Exp      |
|-------------|-------|-------|--------|--------|-----------|-----------------|----------|
| <b>BPEA</b> | $S_1$ | 2.411 | 2.793  | 2.406  | 2.779     | 2.814           | 2.43     |
|             | $T_1$ | 1.329 | 1.694  | 1.315  | 1.236     | 1.325           | 1.24     |
| <b>1</b>    | $S_1$ | 2.306 | 2.667  | 2.306  | 2.652     | 2.682           | 2.48     |
|             | $T_1$ | 1.186 | 1.549  | 1.165  | 1.040     | 1.142           | 1.12-1.3 |
| <b>2</b>    | $S_1$ | 2.277 | 2.666  | 2.273  | 2.658     | 2.691           | 2.34     |
|             | $T_1$ | 1.226 | 1.589  | 1.194  | 1.101     | 1.200           | 1.12-1.3 |
| <b>3</b>    | $S_1$ | 2.301 | 2.704  | 2.297  | 2.701     | 2.735           | 2.34     |
|             | $T_1$ | 1.258 | 1.619  | 1.235  | 1.147     | 1.244           | 1.12-1.3 |

Table S5. Comparing the theoretical  $E(S_1-2T_1)$  of monomers and dimers calculated by different functionals with experiments. The basis set is 6-311+g\*\*. The experimental data come from ref<sup>1-3</sup>. (unit: eV).

|             |         | PBE0   | M06-2X | M06-HF | CAM-B3LYP | $\omega$ B97X-D | Exp       |
|-------------|---------|--------|--------|--------|-----------|-----------------|-----------|
| <b>BPEA</b> | monomer | -0.109 | -0.616 | -0.193 | 0.329     | 0.171           | -         |
|             | dimer   | -0.247 | -0.595 | -0.224 | 0.307     | 0.164           | 0-0.19    |
| <b>1</b>    | monomer | 0.066  | -0.439 | -0.014 | 0.591     | 0.416           | 0.35-0.69 |
|             | dimer   | -0.065 | -0.433 | -0.025 | 0.571     | 0.398           | 0.1-0.42  |
| <b>2</b>    | monomer | -0.044 | -0.540 | -0.100 | 0.455     | 0.292           | 0.35-0.69 |
|             | dimer   | -0.174 | -0.511 | -0.115 | 0.456     | 0.292           | 0.1-0.42  |
| <b>3</b>    | monomer | -0.096 | -0.575 | -0.164 | 0.394     | 0.237           | 0.35-0.69 |
|             | dimer   | -0.216 | -0.534 | -0.173 | 0.407     | 0.248           | 0.1-0.42  |

Table S6. The calculated lowest three singlet excited state of the monomers of **BPEA** and its derivatives. The basis set is 6-311+g\*\*. (unit: eV).

|             |                | PBE0  | M06-2X | M06-HF | CAM-B3LYP | $\omega$ B97X-D |
|-------------|----------------|-------|--------|--------|-----------|-----------------|
| <b>BPEA</b> | S <sub>1</sub> | 2.608 | 2.865  | 2.559  | 2.843     | 2.873           |
|             | S <sub>2</sub> | 3.740 | 3.930  | 3.644  | 3.895     | 3.913           |
|             | S <sub>3</sub> | 3.867 | 4.400  | 3.855  | 4.400     | 4.480           |
| <b>1</b>    | S <sub>1</sub> | 2.471 | 2.714  | 2.424  | 2.694     | 2.723           |
|             | S <sub>2</sub> | 3.624 | 3.832  | 3.553  | 3.799     | 3.817           |
|             | S <sub>3</sub> | 3.648 | 4.172  | 3.625  | 4.205     | 4.290           |
| <b>2</b>    | S <sub>1</sub> | 2.473 | 2.737  | 2.432  | 2.718     | 2.751           |
|             | S <sub>2</sub> | 3.477 | 3.898  | 3.476  | 3.867     | 3.886           |
|             | S <sub>3</sub> | 3.704 | 4.085  | 3.612  | 4.116     | 4.227           |
| <b>3</b>    | S <sub>1</sub> | 2.490 | 2.769  | 2.453  | 2.752     | 2.788           |
|             | S <sub>2</sub> | 3.471 | 3.885  | 3.485  | 3.853     | 3.872           |
|             | S <sub>3</sub> | 3.607 | 4.135  | 3.590  | 4.176     | 4.313           |

Table S7. The calculated lowest three triplet excited state of the monomers of **BPEA** and its derivatives. The basis set is 6-311+g\*\*. (unit: eV).

|             |                | <b>PBE0</b> | <b>M06-2X</b> | <b>M06-HF</b> | <b>CAM-B3LYP</b> | <b><math>\omega</math>B97X-D</b> |
|-------------|----------------|-------------|---------------|---------------|------------------|----------------------------------|
| <b>BPEA</b> | T <sub>1</sub> | 1.358       | 1.741         | 1.376         | 1.257            | 1.351                            |
|             | T <sub>2</sub> | 2.983       | 3.468         | 3.022         | 3.116            | 3.236                            |
|             | T <sub>3</sub> | 3.132       | 3.569         | 3.171         | 3.246            | 3.370                            |
| <b>1</b>    | T <sub>1</sub> | 1.203       | 1.577         | 1.219         | 1.052            | 1.154                            |
|             | T <sub>2</sub> | 2.785       | 3.260         | 2.816         | 2.883            | 3.009                            |
|             | T <sub>3</sub> | 2.886       | 3.367         | 2.915         | 2.959            | 3.089                            |
| <b>2</b>    | T <sub>1</sub> | 1.258       | 1.639         | 1.266         | 1.131            | 1.230                            |
|             | T <sub>2</sub> | 2.788       | 3.262         | 2.810         | 2.920            | 3.042                            |
|             | T <sub>3</sub> | 2.927       | 3.407         | 2.949         | 3.023            | 3.150                            |
| <b>3</b>    | T <sub>1</sub> | 1.293       | 1.672         | 1.309         | 1.179            | 1.276                            |
|             | T <sub>2</sub> | 2.841       | 3.318         | 2.875         | 2.978            | 3.101                            |
|             | T <sub>3</sub> | 2.902       | 3.381         | 2.938         | 3.043            | 3.166                            |

Table S8. The calculated lowest three singlet excited state of the dimers of **BPEA** and its derivatives. The basis set is 6-311+g\*\*. (unit: eV).

|             |                | <b>PBE0</b> | <b>M06-2X</b> | <b>M06-HF</b> | <b>CAM-B3LYP</b> | <b><math>\omega</math>B97X-D</b> |
|-------------|----------------|-------------|---------------|---------------|------------------|----------------------------------|
| <b>BPEA</b> | S <sub>1</sub> | 2.411       | 2.793         | 2.406         | 2.779            | 2.814                            |
|             | S <sub>2</sub> | 2.463       | 2.804         | 2.457         | 2.868            | 2.851                            |
|             | S <sub>3</sub> | 2.614       | 3.266         | 2.608         | 3.317            | 3.596                            |
| <b>1</b>    | S <sub>1</sub> | 2.306       | 2.666         | 2.306         | 2.652            | 2.682                            |
|             | S <sub>2</sub> | 2.376       | 2.671         | 2.368         | 2.666            | 2.702                            |
|             | S <sub>3</sub> | 2.430       | 3.120         | 2.439         | 3.228            | 3.456                            |
| <b>2</b>    | S <sub>1</sub> | 2.277       | 2.666         | 2.273         | 2.658            | 2.691                            |
|             | S <sub>2</sub> | 2.336       | 2.673         | 2.332         | 2.684            | 2.729                            |
|             | S <sub>3</sub> | 2.471       | 3.113         | 2.468         | 3.221            | 3.447                            |
| <b>3</b>    | S <sub>1</sub> | 2.301       | 2.704         | 2.297         | 2.701            | 2.735                            |
|             | S <sub>2</sub> | 2.374       | 2.708         | 2.372         | 2.716            | 2.765                            |
|             | S <sub>3</sub> | 2.487       | 3.144         | 2.485         | 3.251            | 3.478                            |

Table S9. The calculated lowest three triplet excited state of the dimers of **BPEA** and its derivatives. The basis set is 6-311+g\*\*. (unit: eV).

|             |                | <b>PBE0</b> | <b>M06-2X</b> | <b>M06-HF</b> | <b>CAM-B3LYP</b> | <b><math>\omega</math>B97X-D</b> |
|-------------|----------------|-------------|---------------|---------------|------------------|----------------------------------|
| <b>BPEA</b> | T <sub>1</sub> | 1.329       | 1.694         | 1.315         | 1.236            | 1.325                            |
|             | T <sub>2</sub> | 1.362       | 1.737         | 1.364         | 1.248            | 1.358                            |
|             | T <sub>3</sub> | 2.517       | 3.220         | 2.547         | 3.047            | 3.215                            |
| <b>1</b>    | T <sub>1</sub> | 1.186       | 1.549         | 1.165         | 1.040            | 1.142                            |
|             | T <sub>2</sub> | 1.209       | 1.577         | 1.198         | 1.063            | 1.164                            |
|             | T <sub>3</sub> | 2.379       | 3.079         | 2.419         | 2.857            | 2.982                            |
| <b>2</b>    | T <sub>1</sub> | 1.226       | 1.589         | 1.194         | 1.101            | 1.199                            |
|             | T <sub>2</sub> | 1.265       | 1.638         | 1.251         | 1.143            | 1.239                            |
|             | T <sub>3</sub> | 2.382       | 3.083         | 2.415         | 2.908            | 3.030                            |
| <b>3</b>    | T <sub>1</sub> | 1.258       | 1.619         | 1.235         | 1.147            | 1.244                            |
|             | T <sub>2</sub> | 1.301       | 1.672         | 1.295         | 1.191            | 1.287                            |
|             | T <sub>3</sub> | 2.411       | 3.121         | 2.445         | 2.969            | 3.092                            |

## C Analysis of the Electronic States

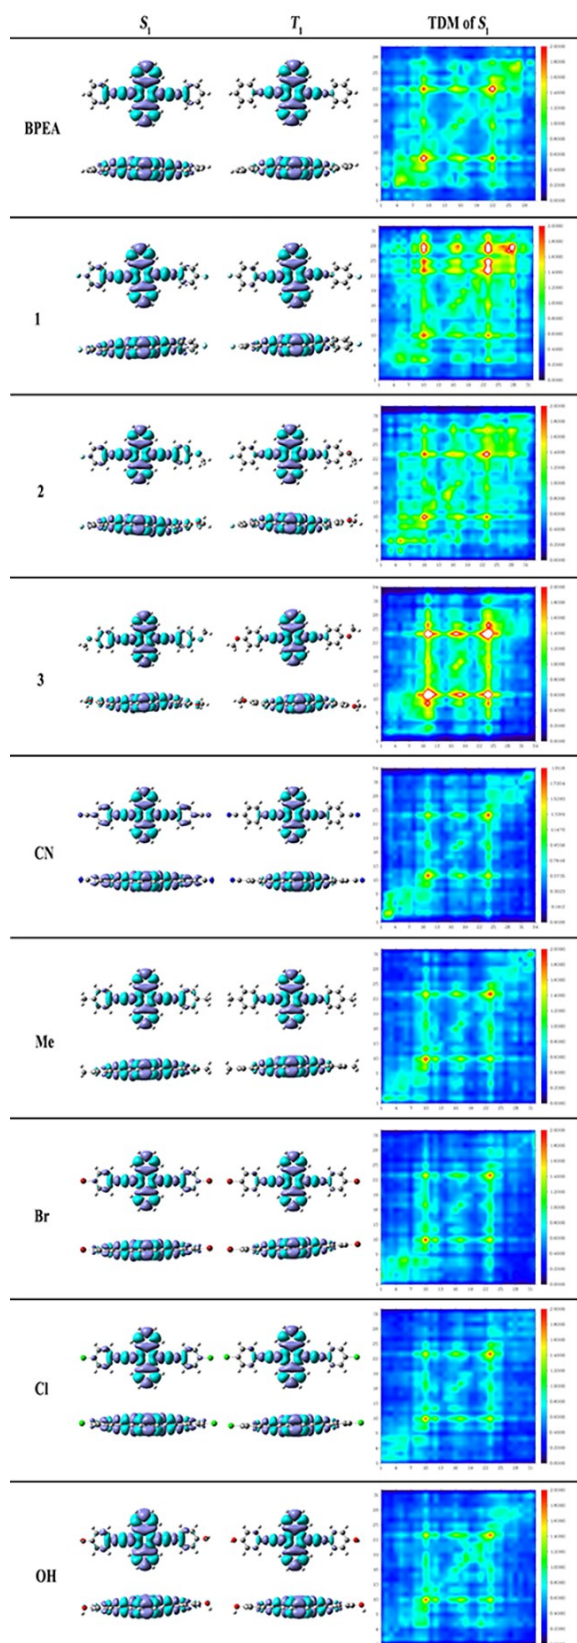

Figure S3. The CDDs of  $S_1$  and  $T_1$  and the heat map of  $S_0 \rightarrow S_1$  transition density matrix (TDM) for all **BPEA** derivatives.



Table S10 The calculated transition electric dipole moments of the monomers of BPEA and its derivatives. The methods is  $\omega$ B97X-D with 6-311+G\*\*. (unit: Au).

|          | X       | Y       | Z       | Dip     |
|----------|---------|---------|---------|---------|
| CN       | 4.3665  | -0.0003 | 0.0056  | 19.0667 |
| Cl       | 4.2134  | -0.0001 | 0.0063  | 17.7528 |
| Br       | 4.3028  | 0.0001  | 0.0077  | 18.5139 |
| <b>1</b> | 3.7261  | 0.1563  | 0.0178  | 13.9088 |
| BPEA     | -3.6421 | 0.0544  | 0.0609  | 13.2714 |
| Me       | 4.1181  | -0.0003 | -0.0052 | 16.9591 |
| <b>3</b> | -2.7349 | -0.3573 | -2.7922 | 15.4032 |
| OH       | -4.0493 | -0.0001 | -0.0055 | 16.3966 |

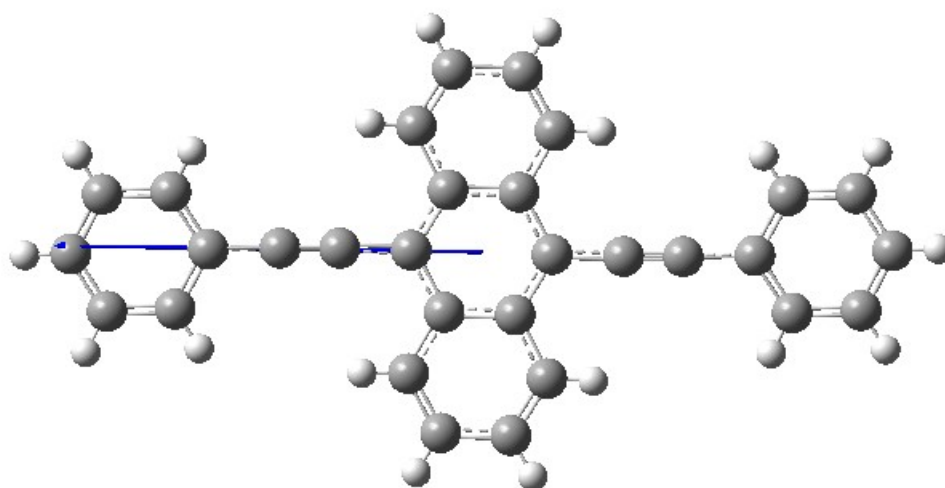

Figure S4. The Transition dipole moment direction of BPEA monomer.

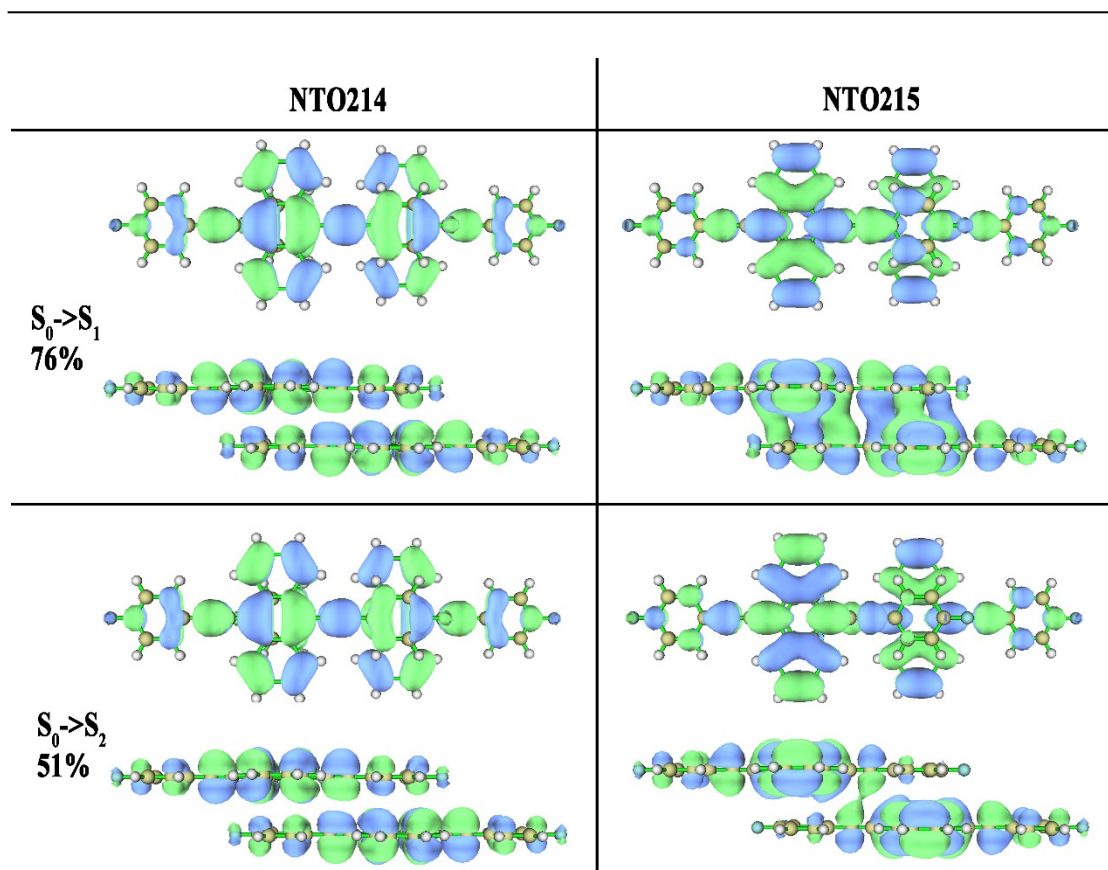

Figure S5. The natural orbital (orbit214  $\rightarrow$  orbit215) diagram of the transition of derivative 1 from the ground state to the first two singlet excited states at the minima point in the X direction. ( $x=6.7\text{\AA}$ )

Table S11 The first five excitation energies of the singlet and triplet states of BPEA and its derivatives at the minima point in the X direction. (unit: eV)

|                | BPEA<br>(6.9Å) | 1<br>(6.7Å) | 2<br>(6.9Å) | 3<br>(6.7Å) | Br<br>(6.7Å) | Cl<br>(6.7Å) | CN<br>(6.9Å) | Me<br>(6.7Å) | OH<br>(6.7Å) |
|----------------|----------------|-------------|-------------|-------------|--------------|--------------|--------------|--------------|--------------|
| S <sub>1</sub> | 2.4896         | 2.4828      | 2.4596      | 2.4314      | 2.3830       | 2.4136       | 2.3786       | 2.4351       | 2.4577       |
| S <sub>2</sub> | 2.6147         | 2.6134      | 2.5853      | 2.5725      | 2.5733       | 2.5854       | 2.5552       | 2.5940       | 2.6065       |
| S <sub>3</sub> | 3.4673         | 3.4431      | 3.3364      | 3.2905      | 3.4005       | 3.4155       | 3.3971       | 3.4023       | 3.3910       |
| S <sub>4</sub> | 3.5029         | 3.4806      | 3.4734      | 3.3516      | 3.4599       | 3.4664       | 3.4506       | 3.4511       | 3.5128       |
| S <sub>5</sub> | 3.6767         | 3.6878      | 3.7248      | 3.7189      | 3.6648       | 3.6712       | 3.6464       | 3.6709       | 3.6829       |
| T <sub>1</sub> | 1.0386         | 1.0372      | 1.0359      | 1.0325      | 1.0001       | 1.0118       | 1.0020       | 1.0199       | 1.0281       |
| T <sub>2</sub> | 1.0934         | 1.0926      | 1.0821      | 1.0789      | 1.0761       | 1.0807       | 1.0749       | 1.0851       | 1.0940       |
| T <sub>3</sub> | 2.7784         | 2.7627      | 2.7295      | 2.7016      | 2.6873       | 2.7026       | 2.6613       | 2.7400       | 2.7462       |
| T <sub>4</sub> | 2.9641         | 2.9511      | 2.9212      | 2.8929      | 2.8730       | 2.8940       | 2.8441       | 2.9466       | 2.9440       |
| T <sub>5</sub> | 3.0260         | 2.9983      | 2.9448      | 2.9426      | 2.8875       | 2.9035       | 2.8695       | 2.9899       | 2.9813       |

## Reference

<sup>1</sup> Y. J. Bae, J. A. Christensen, G. Kang, J. Zhou, R. M. Young, Y. L. Wu, R. P. Van Duyne, G. C. Schatz, and M. R. Wasielewski, *J Chem Phys* **151** (4), 044501 (2019).

<sup>2</sup> Y. J. Bae, G. Kang, C. D. Malliakas, J. N. Nelson, J. Zhou, R. M. Young, Y. L. Wu, R. P. Van Duyne, G. C. Schatz, and M. R. Wasielewski, *J Am Chem Soc* **140** (45), 15140 (2018).

<sup>3</sup> Biswajit Manna, Amitabha Nandi, and Rajib Ghosh, *The Journal of Physical Chemistry C* **122** (36), 21047 (2018).
